# Supplementary material
Source: ML conference proceedings conference paper supplement (https://openreview.net/forum?id=fJYsE7Kq7o)
Supplement: supplementary_material [file attachment]

## 648 A PROOFS

### 649 A.1 PROOF OF PROPOSITIONS

650 **Proposition 2** In the context of Assumption 1, the following holds.

- 651 1. The marginal distribution for each component is  $N_i \sim \mathcal{N}(0, \sigma^2)$ .
- 652 2. The sum of the components is zero :  $\sum_{i=1}^M N_i = 0$ .

653 *Proof of Proposition 2.* We prove each point separately.

- 654 1. The marginal variance of each component  $N_i$  is given by the diagonal entry  $\Sigma_{ii}$ , which is  $\sigma^2$  by definition. Since the parent distribution is a multivariate normal with a mean vector of zero, each component is marginally distributed as  $\mathcal{N}(0, \sigma^2)$ .
- 655 2. We compute the variance of the sum of the components:

$$656 \text{Var} \left( \sum_{i=1}^M N_i \right) = \sum_{i,j} \text{Cov}(N_i, N_j) = \sum_{i=1}^M \sum_{j=1}^M \Sigma_{ij} \quad (20)$$

$$657 = \sum_{i=1}^M \text{Var}(N_i) + \sum_{i \neq j} \text{Cov}(N_i, N_j) \quad (21)$$

$$658 = M \cdot \sigma^2 + M(M-1) \cdot \left( -\frac{\sigma^2}{M-1} \right) \quad (22)$$

$$659 = M\sigma^2 - M\sigma^2 = 0. \quad (23)$$

660 The expectation of the sum is  $\mathbb{E} \left[ \sum_{i=1}^M N_i \right] = \sum_{i=1}^M \mathbb{E}[N_i] = 0$ . A random variable with zero mean and zero variance must be equal to zero almost surely. Thus,  $\sum_{i=1}^M N_i = 0$ .  $\square$

661 **Proposition 3** (Wasserstein Distance Decomposition). *Let  $\mu$  and  $\nu$  be two non-negative measures on a space  $\mathcal{X}$  with equal total mass. It holds that*

$$662 W_p^p(\mu, \nu) \leq W_p^p((\mu - \nu)_+, (\nu - \mu)_+). \quad (24)$$

663 *Proof of Proposition 3.* We can decompose any two measures  $\mu$  and  $\nu$  into a common part and two disjoint parts. Let  $m$  be the largest measure such that for all Borel set  $A$

$$664 m(A) \leq \mu(A) \text{ and } m(A) \leq \nu(A).$$

665 The remaining, disjoint parts of each measure are given by  $\mu' := \mu - m = (\mu - \nu)_+$  as well as  $\nu' := \nu - m = (\nu - \mu)_+$ . Thus, we can write:

$$666 \mu = m + \mu' \quad \nu = m + \nu' \quad (25)$$

667 Since  $\mu$  and  $\nu$  have the same total mass, it follows that  $\mu'$  and  $\nu'$  also have the same total mass.

668 We can then construct a valid transport plan  $\pi$  from  $\mu$  to  $\nu$  by handling the common and disjoint parts separately. For the disjoint parts, let  $\pi'_{\text{opt}}$  be the optimal transport plan from  $\mu'$  to  $\nu'$ , whose cost is, by definition,  $W_p^p(\mu', \nu')$ . For the common part, we use the identity plan,  $\pi_{\text{id}}$ , which transports the mass at each point  $x$  to itself. The cost of this plan is  $\int_{\mathcal{X}} d(x, x)^p d\pi_{\text{id}}(x) = 0$ .

669 Using the gluing principle, we can form a complete transport plan  $\pi = \pi_{\text{id}} + \pi'_{\text{opt}}$ . This is a valid plan transporting  $\mu$  to  $\nu$ . Its total cost is the sum of the costs of its components:

$$670 \text{Cost}(\pi) = \text{Cost}(\pi_{\text{id}}) + \text{Cost}(\pi'_{\text{opt}}) = 0 + W_p^p(\mu', \nu') \quad (26)$$

671 By the definition of the Wasserstein distance as the infimum of costs over all possible transport plans, the true optimal cost must be less than or equal to the cost of this specific plan:

$$672 W_p^p(\mu, \nu) \leq W_p^p(\mu', \nu') \quad (27)$$

673 Substituting the definitions of  $\mu'$  and  $\nu'$  completes the proof.  $\square$

**Proposition 4.** Let  $\mu : G_n \rightarrow [0, 1]$  be a probability measure on the  $n \times n$  unit grid  $G_n$  with cyclic boundary conditions and let  $\varepsilon : G_n \rightarrow \mathbb{R}$  be a signed noise measure that satisfy Assumption 1. Then, for  $p > 1$ ,

$$W_p^\pm(\mu, \mu + \varepsilon) \leq W_p(\varepsilon_-, \varepsilon_+). \quad (28)$$

*Proof of Proposition 4.* By definition,

$$(W_p^\pm)^p(\mu, \mu + \varepsilon) = W_p^p\left(\mu + (\mu + \varepsilon)_-, (\mu + \varepsilon)_+\right). \quad (29)$$

Thus, using Proposition 3 on  $\mu + (\mu + \varepsilon)_-$  and  $(\mu + \varepsilon)_+$ , we get

$$W_p^p\left(\mu + (\mu + \varepsilon)_-, (\mu + \varepsilon)_+\right) \quad (30)$$

$$\leq W_p^p\left(\left(\mu + (\mu + \varepsilon)_- - (\mu + \varepsilon)_+\right)_+, \left((\mu + \varepsilon)_+ - (\mu + (\mu + \varepsilon)_-)\right)_+\right) \quad (31)$$

$$= W_p^p\left(\left(\mu - ((\mu + \varepsilon)_+ - (\mu + \varepsilon)_-)\right)_+, \left((\mu + \varepsilon)_+ - (\mu + \varepsilon)_- - \mu\right)_+\right) \quad (32)$$

$$= W_p^p\left(\left(\mu - (\mu + \varepsilon)\right)_+, (\mu + \varepsilon - \mu)_+\right) \quad (33)$$

$$= W_p^p\left(\left(-\varepsilon\right)_+, \varepsilon_+\right) = W_p^p(\varepsilon_-, \varepsilon_+). \quad \square$$

**Proposition 5.** For any two images  $\mu, \nu : G_n \rightarrow [0, \infty)$  and independent noises  $\varepsilon_\mu, \varepsilon_\nu$  as in Assumption 1,

$$\begin{aligned} & W_1([\mu + \varepsilon_\mu - \nu - \varepsilon_\nu]_+, [\nu + \varepsilon_\nu - \mu - \varepsilon_\mu]_+) \\ & \leq W_1(\mu, \nu) + W_1((\varepsilon_\mu - \varepsilon_\nu)_+, (\varepsilon_\mu - \varepsilon_\nu)_-). \end{aligned}$$

*Proof of Proposition 5.* By Kantorovich–Rubinstein duality,

$$W_1([\mu + \varepsilon_\mu - \nu - \varepsilon_\nu]_+, [\nu + \varepsilon_\nu - \mu - \varepsilon_\mu]_+) = \sup_{\|f\|_{\text{Lip}} \leq 1} \int f(\mu - \nu) + \int f(\varepsilon_\mu - \varepsilon_\nu). \quad (34)$$

For the first term, by KR duality,

$$\sup_{\|f\|_{\text{Lip}} \leq 1} \int f(\mu - \nu) \leq W_1(\mu, \nu) \quad (35)$$

For the second term, via the Jordan decomposition,

$$\sup_{\|f\|_{\text{Lip}} \leq 1} \int f(\varepsilon_\mu - \varepsilon_\nu) \leq W_1((\varepsilon_\mu - \varepsilon_\nu)_+, (\varepsilon_\mu - \varepsilon_\nu)_-) \quad (36)$$

Adding these together, we receive the desired bound.  $\square$

**Proposition 6.** Let  $\mu, \nu : G_n \rightarrow [0, \infty)$  be images on the square grid  $G_n$  with spacing  $h = 1/n$ , and let  $\varepsilon_\mu, \varepsilon_\nu$  satisfy Assumption 1. Identifying  $G_n$  with the 2-torus, let  $D := \text{diam}(G_n) = \sqrt{2}/2$ . Then, for any  $p \geq 1$ ,

$$W_p^\pm(\mu + \varepsilon_\mu, \nu + \varepsilon_\nu) \leq D^{1-\frac{1}{p}} (W_1(\mu, \nu) + W_1(\varepsilon_\mu^*, \varepsilon_\nu^*))^{\frac{1}{p}}, \quad \varepsilon^* := \varepsilon_\mu - \varepsilon_\nu \quad (37)$$

*Proof.* By definition of the signed distance,

$$W_p^\pm(\mu + \varepsilon_\mu, \nu + \varepsilon_\nu) = W_p\left(\left(\mu + \varepsilon_\mu\right)_+ + \left(\nu + \varepsilon_\nu\right)_-, \left(\nu + \varepsilon_\nu\right)_+ + \left(\mu + \varepsilon_\mu\right)_-\right). \quad (38)$$

Applying the decomposition inequality of Proposition 3 (which “drops the overlap”) to these non-negative arguments gives

$$W_p^\pm(\mu + \varepsilon_\mu, \nu + \varepsilon_\nu) \leq W_p\left([\mu + \varepsilon_\mu - \nu - \varepsilon_\nu]_+, [\nu + \varepsilon_\nu - \mu - \varepsilon_\mu]_+\right). \quad (39)$$

For general  $p \geq 1$  on a bounded domain of diameter  $D$  we use the standard comparison

$$W_p(\alpha, \beta) \leq D^{1-\frac{1}{p}} W_1(\alpha, \beta)^{\frac{1}{p}}. \quad (40)$$

Applying this to  $(\alpha, \beta) = ([\mu + \varepsilon_\mu - \nu - \varepsilon_\nu]_+, [\mu + \varepsilon_\mu - \nu - \varepsilon_\nu]_-)$  yields

$$W_p([\mu + \varepsilon_\mu - \nu - \varepsilon_\nu]_+, [\mu + \varepsilon_\mu - \nu - \varepsilon_\nu]_-) \leq D^{1-\frac{1}{p}} \left( W_1([\mu + \varepsilon_\mu - \nu - \varepsilon_\nu]_+, [\mu + \varepsilon_\mu - \nu - \varepsilon_\nu]_-) \right)^{\frac{1}{p}}. \quad (41)$$

Using Proposition 5, we conclude

$$\begin{aligned} & D^{1-\frac{1}{p}} \left( W_1([\mu + \varepsilon_\mu - \nu - \varepsilon_\nu]_+, [\mu + \varepsilon_\mu - \nu - \varepsilon_\nu]_-) \right)^{\frac{1}{p}} \\ & \leq D^{1-\frac{1}{p}} \left( W_1(\mu, \nu) + W_1((\varepsilon_\mu - \varepsilon_\nu)_+, (\varepsilon_\mu - \varepsilon_\nu)_-) \right)^{\frac{1}{p}}. \end{aligned}$$

Since both  $\varepsilon_\mu$  and  $\varepsilon_\nu$  are normally distributed, we can say that  $\varepsilon^* := \varepsilon_\mu - \varepsilon_\nu$  is also normally distributed, with  $\text{cov}(\varepsilon^*) = 2 \text{cov}(\varepsilon_\mu)$ . Thus,

$$D^{1-\frac{1}{p}} \left( W_1(\mu, \nu) + W_1((\varepsilon_\mu - \varepsilon_\nu)_+, (\varepsilon_\mu - \varepsilon_\nu)_-) \right)^{\frac{1}{p}} \leq D^{1-\frac{1}{p}} \left( W_1(\mu, \nu) + W_1(\varepsilon^*_+, \varepsilon^*_-) \right)^{\frac{1}{p}}. \quad (42)$$

□

## A.2 PROOF OF THEOREMS

**Theorem 1** Consider two  $n \times n$  images  $\mu$  and  $\nu$  having at least  $\lambda n^2$ ,  $\lambda \in (0, 1]$  nonzero pixels. Assume that  $\varepsilon_\mu, \varepsilon_\nu$  are  $\mathcal{N}(0_{n^2}, \sigma^2 I_{n^2})$ . Recall the definition of  $\bar{S}_{\mu_\varepsilon, \nu_\varepsilon}, \bar{T}_{\mu_\varepsilon, \nu_\varepsilon}$  in equation 8. Then,

$$W_1^\pm(\bar{S}_{\mu_\varepsilon, \nu_\varepsilon}, \bar{T}_{\mu_\varepsilon, \nu_\varepsilon}) = \frac{1}{\sum_{x \in G_n} S_{\mu_\varepsilon, \nu_\varepsilon}(x)} \sup_{f \in \text{Lip}_1} \left\langle f, S_{\mu_\varepsilon, \nu_\varepsilon} - T_{\mu_\varepsilon, \nu_\varepsilon} \left( 1 + O_p\left(\frac{\sigma}{n}\right) \right) \right\rangle. \quad (43)$$

*Proof of Theorem 1.* First let us remark that

$$\sum_{x \in G_n} S_{\mu_\varepsilon, \nu_\varepsilon}(x) - T_{\mu_\varepsilon, \nu_\varepsilon}(x) = \sum_{x \in G_n} \mu(x) + \varepsilon_\mu(x) - \nu(x) - \varepsilon_\nu(x) \quad (44)$$

$$= 0 + \sum_{x \in G_n} \varepsilon_\mu(x) - \varepsilon_\nu(x), \quad (45)$$

as

$$\sum_{x \in G_n} \mu_+(x) + \nu_-(x) = \sum_{x \in G_n} \nu_+(x) + \mu_-(x) \quad (46)$$

and thus

$$\sum_{x \in G_n} \mu(x) - \nu(x) = 0. \quad (47)$$

Remark that under our assumptions,

$$\sum_{x \in G_n} \varepsilon_\mu(x) - \varepsilon_\nu(x) \sim \mathcal{N}(0, 2\sigma^2 N^2). \quad (48)$$

Because of this, one has that

$$\sum_{x \in G_n} S_{\mu_\varepsilon, \nu_\varepsilon}(x) = \sum_{x \in G_n} T_{\mu_\varepsilon, \nu_\varepsilon}(x) \left( 1 + \frac{O_p(\sigma N)}{\sum_{x \in G_n} T_{\mu_\varepsilon, \nu_\varepsilon}(x)} \right). \quad (49)$$

Owing to our assumption on the signals, notice that

$$\sum_{x \in G_n} T_{\mu_\varepsilon, \nu_\varepsilon}(x) = O_p(N^2). \quad (50)$$

Therefore,

$$W_1(\bar{S}_{\mu_\varepsilon, \nu_\varepsilon}, \bar{T}_{\mu_\varepsilon, \nu_\varepsilon}) = \sup_{f \in \text{Lip}_1} \langle \bar{S}_{\mu_\varepsilon, \nu_\varepsilon} - \bar{T}_{\mu_\varepsilon, \nu_\varepsilon}, f \rangle \quad (51)$$

$$= \sup_{f \in \text{Lip}_1} \left\langle \frac{S_{\mu_\varepsilon, \nu_\varepsilon}}{\sum_{x \in G_n} S_{\mu_\varepsilon, \nu_\varepsilon}(x)} - \frac{T_{\mu_\varepsilon, \nu_\varepsilon}}{\sum_{x \in G_n} T_{\mu_\varepsilon, \nu_\varepsilon}(x)}, f \right\rangle \quad (52)$$

$$= \frac{1}{\sum_{x \in G_n} S_{\mu_\varepsilon, \nu_\varepsilon}(x)} \sup_{f \in \text{Lip}_1} \left\langle S_{\mu_\varepsilon, \nu_\varepsilon} - T_{\mu_\varepsilon, \nu_\varepsilon} \left( 1 + \frac{O_p(\sigma N)}{\sum_{x \in G_n} T_{\mu_\varepsilon, \nu_\varepsilon}(x)} \right), f \right\rangle. \quad (53)$$

□

**Theorem 2** Let  $\mu : G_n \rightarrow [0, 1]$  be a probability measure on the  $n \times n$  unit grid  $G_n$  with cyclic boundary conditions. Let  $\varepsilon_1, \varepsilon_2$  be independent random signed measures on the grid that satisfy Assumption 1. Then

$$\frac{n\sigma}{\sqrt{\pi}} \leq \mathbb{E}W_1^\pm(\mu + \varepsilon_1, \mu + \varepsilon_2) \leq \frac{2\sqrt{2}n \log_2 n}{\sqrt{\pi}} \sigma + \frac{n}{\sqrt{2\pi}} \sigma. \quad (54)$$

*Proof of Theorem 2.* Using the Kantorovich–Rubinstein duality,

$$W_1^\pm(\mu, \mu + \varepsilon) = \sup_{f \in \text{Lip}_1} \langle f, \varepsilon \rangle = W_1(\varepsilon_+, \varepsilon_-). \quad (55)$$

$$W_1^\pm(\mu + \varepsilon_1, \mu + \varepsilon_2) = \sup_{f \in \text{Lip}_1} \langle f, \varepsilon_1 - \varepsilon_2 \rangle = W_1((\varepsilon_1 - \varepsilon_2)_+, (\varepsilon_1 - \varepsilon_2)_-). \quad (56)$$

The first equality is the signed dual form with  $\mu + \varepsilon_1 - (\mu + \varepsilon_2) = \varepsilon_1 - \varepsilon_2$ . For simplicity, one can define  $\varepsilon^* = \varepsilon_1 - \varepsilon_2$  such that  $\mathbb{E}[\varepsilon^*] = \sqrt{2}\mathbb{E}[\varepsilon_1]$  as a sum of normally distributed random variables. Then, for the second equality,  $\int \varepsilon^* = 0$  implies  $\varepsilon^* = \varepsilon_+^* - \varepsilon_-^*$  with equal masses, so the balanced duality gives  $W_1(\varepsilon_+^*, \varepsilon_-^*) = \sup_{f \in \text{Lip}_1} \langle f, \varepsilon^* \rangle$

Let  $m = \varepsilon_+^*(G_n) = \varepsilon_-^*(G_n)$ . By homogeneity of  $W_1$ ,

$$W_1(\varepsilon_+^*, \varepsilon_-^*) = m W_1\left(\frac{\varepsilon_+^*}{m}, \frac{\varepsilon_-^*}{m}\right). \quad (57)$$

Apply Proposition 1 to the probability measures  $\varepsilon_+/m$  and  $\varepsilon_-/m$ . There exists an integer  $k^*$  with  $k^* = \log_2 n$  such that

$$W_1\left(\frac{\varepsilon_+^*}{m}, \frac{\varepsilon_-^*}{m}\right) \leq \frac{\sqrt{2}}{2} 2^{-k^*} + \frac{\sqrt{2}}{2} \sum_{k=0}^{k^*} 2^{-k} \sum_{Q \in \mathcal{D}_k} \left| \left(\frac{\varepsilon_+^*}{m} - \frac{\varepsilon_-^*}{m}\right)(Q) \right|. \quad (58)$$

Multiplying by  $m$  gives

$$W_1(\varepsilon_+^*, \varepsilon_-^*) \leq \frac{\sqrt{2}}{2} m 2^{-k^*} + \frac{\sqrt{2}}{2} \sum_{k=0}^{k^*} 2^{-k} \sum_{Q \in \mathcal{D}_k} \left| \sum_{x \in Q} \varepsilon^*(x) \right|. \quad (59)$$

Taking expectations and using independence and zero mean of the noise,

$$\mathbb{E}W_1(\varepsilon_+^*, \varepsilon_-^*) \leq \frac{\sqrt{2}}{2} 2^{-k^*} \mathbb{E}m + \frac{\sqrt{2}}{2} \sum_{k=0}^{k^*} 2^{-k} \sum_{Q \in \mathcal{D}_k} \mathbb{E} \left| \sum_{x \in Q} \varepsilon^*(x) \right|. \quad (60)$$

Since each  $\varepsilon^*(x)$  is Gaussian with variance  $2\sigma^2$ , one has  $\mathbb{E} \left| \sum_{x \in Q} \varepsilon^*(x) \right| \leq \sqrt{2}\sigma \sqrt{|Q|} \sqrt{2/\pi}$  and  $\mathbb{E}m = \sum_{x \in G_n} \mathbb{E}(\varepsilon^*(x))_+ = n^2 \sqrt{2}\sigma / \sqrt{2\pi}$ . Furthermore, the dyadic family  $\mathcal{D}_k$  has  $|\mathcal{D}_k| = 2^{2k}$  cubes of cardinality  $|Q| = n^2 / 2^{2k}$ . Therefore

$$\sum_{Q \in \mathcal{D}_k} \mathbb{E} \left| \sum_{x \in Q} \varepsilon^*(x) \right| \leq \sigma \sqrt{\frac{2}{\pi}} \sum_{Q \in \mathcal{D}_k} \sqrt{|Q|} = \sigma \sqrt{\frac{2}{\pi}} \cdot 2^{2k} \cdot \frac{n}{2^k} = 2\sigma \sqrt{\frac{1}{\pi}} n 2^k. \quad (61)$$

864 Plugging this into the multiscale sum yields

$$865 \frac{\sqrt{2}}{2} \sum_{k=0}^{k^*} 2^{-k} \sum_{Q \in \mathcal{D}_k} \mathbb{E} \left| \sum_{x \in Q} \varepsilon^*(x) \right| \leq \frac{\sqrt{2}}{2} 2\sigma \sqrt{\frac{1}{\pi}} n \sum_{k=0}^{k^*} 1 \leq \sqrt{2}\sigma \sqrt{\frac{1}{\pi}} n(k^* + 1). \quad (62)$$

866 With  $k^* = \log_2 n$  this gives the  $\sigma n \log_2 n$  contribution.

867 For the coarse term choose  $k^*$  so that  $2^{-k^*} = 1/n$ . Then

$$868 \frac{\sqrt{2}}{2} 2^{-k^*} \mathbb{E} m = \frac{\sqrt{2}}{2} \frac{1}{n} \cdot \frac{n^2 \sqrt{2}\sigma}{\sqrt{2\pi}} = \frac{\sigma n}{\sqrt{2\pi}}, \quad (63)$$

869 which is the  $\sigma n$  contribution.

870 Collecting the two contributions and absorbing absolute constants into the displayed coefficients yields

$$871 \mathbb{E} W_1(\varepsilon_+, \varepsilon_-) \leq \frac{2\sqrt{2}}{\sqrt{\pi}} n \log_2 n \sigma + \frac{1}{\sqrt{2\pi}} n \sigma. \quad (64)$$

872 In this derivation the factor  $m$  appears only in the coarse term and contributes to the  $\sigma n$  piece after expectation. In the oscillation terms it cancels with the normalization, so no additional dependence on  $m$  remains. There is no additive grid term independent of  $\sigma$ , hence no  $1/(\sqrt{2}n)$  tail.

873 **Proof of the lower bound** Let  $f : G_n \rightarrow \mathbb{R}$  be the following,

$$874 f(x) := \begin{cases} -\frac{1}{2n} & \text{if } \varepsilon(x) < 0, \\ +\frac{1}{2n} & \text{if } \varepsilon(x) \geq 0. \end{cases} \quad (65)$$

875 Since the distance between neighboring pixels is  $1/n$  it follows that  $f$  is 1-Lipschitz. Therefore, by the Kantorovich–Rubinstein duality,

$$876 W_1(\mu, \mu + \varepsilon) = W_1(\varepsilon_+, \varepsilon_-) \geq \langle f, \varepsilon_+ - \varepsilon_- \rangle \quad (66)$$

877 Taking expectations on both sides and using the symmetry of  $\varepsilon(x)$ , we have

$$878 \mathbb{E} W_1(\mu, \mu + \varepsilon) \geq \mathbb{E} \langle f, \varepsilon_+ \rangle - \mathbb{E} \langle f, \varepsilon_- \rangle = 2\mathbb{E} \langle f, \varepsilon_+ \rangle. \quad (67)$$

879 Recall that the marginal distribution  $\varepsilon(x)$  is  $\mathcal{N}(0, \sigma^2)$ , and therefore conditioned on  $\varepsilon_+(x) > 0$ , we have  $\mathbb{E} \varepsilon_+(x) = \sigma \sqrt{2/\pi}$  since that is the expectation of the half-normal distribution with variance  $\sigma^2$ . In expectation,  $\langle f, \varepsilon_+ \rangle$  is a sum over  $n^2/2$  pixels and its expectation satisfies

$$880 2\mathbb{E} \langle f, \varepsilon_+ \rangle = 2\mathbb{E} \left[ \sum_{x \text{ s.t. } \varepsilon(x) > 0} f(x) \varepsilon_+(x) \right] \quad (68)$$

$$881 = 2 \frac{n^2}{2} \cdot \mathbb{E} [f(x) \varepsilon_+(x) \mid \varepsilon_+(x) > 0] \quad (69)$$

$$882 = n^2 \cdot \frac{1}{2n} \sqrt{\frac{2}{\pi}} \sigma = \frac{n\sigma}{\sqrt{2\pi}}. \quad (70)$$

883 Now,  $W_1^\pm(\mu + \varepsilon_1, \mu + \varepsilon_2) = W_1^\pm(\mu, \mu + \varepsilon_2 - \varepsilon_1)$  but  $\varepsilon_2 - \varepsilon_1$  is just a zero-mean noise vector that satisfies Assumption 1 but with double variance. It follows that

$$884 \mathbb{E} W_1^\pm(\mu + \varepsilon_1, \mu + \varepsilon_2) \geq \sqrt{2} \frac{n\sigma}{\sqrt{2\pi}} = \frac{n\sigma}{\sqrt{\pi}}. \quad (71)$$

885  $\square$

886 **Theorem 3** Let  $\mu : G_n \rightarrow [0, 1]$  be a probability measure on the  $n \times n$  unit grid  $G_n$ . Let  $\varepsilon_1, \varepsilon_2$  be independent random signed measures on the grid that satisfy Assumption 1. For convenience, we again assume that  $n = 2^\eta$ , for  $\eta \in \mathbb{N}$ . Then, for  $p > 1$  with  $p \in \mathbb{N}$ ,

$$887 \mathbb{E} [(W_p^\pm(\mu + \varepsilon_1, \mu + \varepsilon_2))^p] \leq \frac{4\sqrt{2}}{\sqrt{\pi}} n\sigma. \quad (72)$$

Therefore, by Jensen's inequality,

$$\mathbb{E} [W_p^\pm(\mu + \varepsilon_1, \mu + \varepsilon_2)] \leq \left( \frac{4\sqrt{2}}{\sqrt{\pi}} n\sigma \right)^{1/p}.$$

*Proof of Theorem 3.* By Proposition 4 and similarly to the proof of Theorem 2, we only need to upper bound  $W_p(\varepsilon_+^*, \varepsilon_-^*)$  where  $\varepsilon^* = \varepsilon_1 - \varepsilon_2$ .

By the assumption on the noise noise have total zero mass, this quantity is well defined.

Then, by the multiscale bound of Proposition 1

$$W_p^p(\varepsilon_+^*, \varepsilon_-^*) = 2^{-p/2} \varepsilon_+^*(G_n) W_p^p \left( \frac{\varepsilon_+^*}{\varepsilon_+^*(G_n)}, \frac{\varepsilon_-^*}{\varepsilon_+^*(G_n)} \right) \quad (73)$$

$$\leq 2^{-pk^* - p/2} \varepsilon_+^*(G_n) + 2^{-p/2} \sum_{k=1}^{k^*} 2^{-p(k-1)} \sum_{Q_i^k \in \mathcal{Q}^k} |\varepsilon_+^*(Q_i^k) - \varepsilon_-^*(Q_i^k)| \quad (74)$$

$$\leq 2^{-pk^* - 1/2} \varepsilon_+^*(G_n) + 2^{-p/2} \sum_{k=1}^{k^*} 2^{-p(k-1)} \sum_{Q_i^k \in \mathcal{Q}^k} |\varepsilon^*(Q_i^k)|. \quad (75)$$

Now, the proof is extremely similar to the previous one and by the same argument,

$$\mathbb{E} \sum_{Q \in \mathcal{Q}_k} |\varepsilon^*(Q)| \leq 4^k \sqrt{\frac{1}{\pi}} 2^{\eta-k} \sigma. \quad (76)$$

As in the previous proof,

$$\mathbb{E} \varepsilon_+^*(G_n) = \frac{n^2}{\sqrt{\pi}} \sigma \sqrt{1 - \frac{1}{n^2}}. \quad (77)$$

Altogether,

$$\mathbb{E} W_p^p(\varepsilon_+^*, \varepsilon_-^*) \leq 2^{-pk^* - 1/2} \frac{4^\eta}{\sqrt{\pi}} \sigma + 2^\eta 2^{p/2} \sum_{k=1}^{k^*} 2^{-(p-1)k} \frac{2}{\sqrt{\pi}} \sigma \quad (78)$$

$$\leq 2^{-pk^* - 1/2} \frac{4^\eta}{\sqrt{\pi}} \sigma + 2^\eta 2^{p/2} \frac{2}{\sqrt{\pi}} \sigma \frac{1 - 2^{-(p-1)k^*}}{2^{p-1} - 1}. \quad (79)$$

$$(80)$$

We take  $k^* = \eta$  again to get

$$\mathbb{E} W_p^p(\varepsilon_+^*, \varepsilon_-^*) \leq 2^{-(p-1)\eta} \frac{2^\eta}{2} \frac{1}{\sqrt{\pi}} \sigma + 2^\eta 2^{p/2} \frac{2}{\sqrt{\pi}} \sigma \frac{1}{2^{p-1} - 3/2} \quad (81)$$

$$\leq \frac{2^\eta}{\sqrt{\pi}} \left( 2^{-(p-1)\eta-1} + \frac{2^{(p+2)/2}}{2^{p-1} - 1} \right) \sigma. \quad (82)$$

Remark that  $2^{-(p-1)\eta-1} \leq \sqrt{2}/2$  and that  $\frac{2^{(p+2)/2}}{2^{p-1}-1}$  is decreasing with value 4 at 2. Thus the expression is bounded by  $4 + \sqrt{2}/2 \leq 4\sqrt{2}$  and the claim follows.  $\square$

**Theorem 4** Let  $\mu, \nu : G_n \rightarrow [0, 1]$  be two probability measures on the  $n \times n$  unit grid  $G_n$  with cyclic boundary conditions and let  $\varepsilon_\mu, \varepsilon_\nu : G_n \rightarrow \mathbb{R}$  be signed noise measures that satisfy Assumption 1. For convenience we assume that  $n = 2^\eta$ , for  $\eta \in \mathbb{N}$ . Then

$$\mathbb{E} [W_1^\pm(\mu + \varepsilon_\mu, \nu + \varepsilon_\nu) - W_1^\pm(\mu, \nu)] \leq \frac{4n \log_2 n + n}{\sqrt{\pi}} \sigma + \frac{\sqrt{2}}{n}. \quad (83)$$

972 *Proof of Theorem 4.* Recall that  $W_1^\pm$  satisfies the triangle inequality, so

$$973 W_1^\pm(\mu + \varepsilon_\mu, \nu + \varepsilon_\nu) \leq W_1^\pm(\mu + \varepsilon_\mu, \mu) + W_1^\pm(\mu, \nu) + W_1^\pm(\nu, \nu + \varepsilon_\nu). \quad (84)$$

974 By symmetry

$$975 \mathbb{E}W_1^\pm(\mu + \varepsilon_\mu, \mu) = \mathbb{E}W_1^\pm(\nu, \nu + \varepsilon_\nu) \quad (85)$$

976 Therefore,

$$977 \mathbb{E}[W_1^\pm(\mu + \varepsilon_\mu, \nu + \varepsilon_\nu) - W_1^\pm(\mu, \nu)] \leq 2\mathbb{E}W_1^\pm(\mu, \mu + \varepsilon_\mu). \quad (86)$$

978 We proceed to upper-bound the RHS. By the definition of the signed Wassetein metric,

$$979 W_1^\pm(\mu, \mu + \varepsilon) = W_1(\mu_+ + (\mu + \varepsilon)_-, (\mu + \varepsilon)_+ + \mu_-) \quad (87)$$

$$980 = W_1(\mu + (\mu + \varepsilon)_-, (\mu + \varepsilon)_+) \quad (\text{since } \mu_+ = \mu \text{ and } \mu_- = 0). \quad (88)$$

981 We now use the dyadic upper bound in equation 9. The image is partitioned into 4 quadrants re-  
982 cursively, thus  $\delta = 1/2$ . Our domain has diameter  $\sqrt{2}/2$  since it is the discrete  $n \times n$  unit grid  
983  $G_n \subset [0, 1] \times [0, 1] \in \mathbb{R}^2$  with cyclic boundary conditions. The inequality only holds for probability  
984 measures, so we need to rescale.

$$985 W_1^\pm(\mu, \mu_\varepsilon) = (\mu + \varepsilon)_+(G_n)W_1^\pm\left(\frac{\mu + (\mu + \varepsilon)_-}{(\mu + \varepsilon)_+(G_n)}, \frac{(\mu + \varepsilon)_+}{(\mu + \varepsilon)_+(G_n)}\right) \quad (89)$$

$$986 \leq \frac{\sqrt{2}}{2} \cdot 2^{-k^*} (\mu + \varepsilon)_+(G_n) + \frac{\sqrt{2}}{2} \sum_{k=1}^{k^*} 2^{-(k-1)} \sum_{Q_i^k \in \mathcal{Q}^k} |(\mu + (\mu + \varepsilon)_-)(Q_i^k) - (\mu + \varepsilon)_+(Q_i^k)|.$$

987 By considering the two cases  $(\mu + \varepsilon)(Q_i^k) \geq 0$  and  $(\mu + \varepsilon)(Q_i^k) < 0$  it is easy to see that the term  
988  $(\mu + (\mu + \varepsilon)_-)(Q_i^k) - (\mu + \varepsilon)_+(Q_i^k)$  is equal to  $-\varepsilon(Q_i^k)$ , so the bound above simplifies to

$$989 W_1^\pm(\mu, \mu_\varepsilon) \leq 2^{-k^* - \frac{1}{2}} (\mu + \varepsilon)_+(G_n) + \frac{\sqrt{2}}{2} \sum_{k=1}^{k^*} 2^{-(k-1)} \sum_{Q_i^k \in \mathcal{Q}^k} |\varepsilon(Q_i^k)|. \quad (90)$$

990 Rewrite the noise as  $\varepsilon = \varepsilon' - \bar{\varepsilon}$  where  $\varepsilon'$  is i.i.d.  $\mathcal{N}(0, \sigma^2)$  at each pixel and  $\bar{\varepsilon} \in \mathbb{R}$  is the mean of  
991 all  $\varepsilon'$  terms across the entire image. Since  $Q_i^k$  is a square region of size  $2^{\eta-k} \times 2^{\eta-k}$  and  $\bar{\varepsilon}$  is the  
992 mean of  $4^\eta$  i.i.d. Gaussian noise terms, it follows that  $\varepsilon'(Q_i^k) \sim \mathcal{N}(0, 4^{\eta-k}\sigma^2)$  and, additionally,  
993  $\bar{\varepsilon} \sim \mathcal{N}(0, \sigma^2/4^\eta) = \mathcal{N}(0, \sigma^2/n^2)$ . Recall that  $\mathbb{E}|X| = \sigma\sqrt{2/\pi}$  when  $X \sim \mathcal{N}(0, \sigma^2)$ .

994 Since  $\varepsilon^*(Q_i^k) = \sum_{x \in Q_i^k} \varepsilon'(x) - 4^{\eta-k}\bar{\varepsilon}$ ,

$$995 \text{Var}(\varepsilon^*(Q_i^k)) = \sigma^2 \left( 4^{\eta-k} + \frac{4^{2(\eta-k)}}{n^2} - 2 \frac{4^{2(\eta-k)}}{n^2} \right). \quad (91)$$

996 Thus,

$$997 \mathbb{E}|\varepsilon^*(Q_i^k)| = \sqrt{\frac{2}{\pi}} \sigma 2^{\eta-k} \left( 1 - n^2 4^{-k} \right)^{1/2}. \quad (92)$$

998 Summing over the  $4^k$  cells at level  $k$ ,

$$999 \mathbb{E} \sum_{Q \in \mathcal{Q}_k} |\varepsilon^*(Q)| = 4^k \sqrt{\frac{2}{\pi}} \sigma 2^{\eta-k} \left( 1 - n^2 4^{-k} \right)^{1/2}. \quad (93)$$

1000 Plugging this back into the RHS of equation 90 and recalling that  $2^\eta = n$  gives

$$1001 \mathbb{E} \left[ \frac{\sqrt{2}}{2} \sum_{k=1}^{k^*} 2^{-(k-1)} \sum_{Q_i^k \in \mathcal{Q}^k} |\varepsilon(Q_i^k)| \right] \leq \frac{\sqrt{2}}{2} \sum_{k=1}^{k^*} 2^{-(k-1)} 4^k \sqrt{\frac{2}{\pi}} \sigma 2^{\eta-k} \quad (94)$$

$$1002 = \frac{2^{\eta+1} \sigma}{\sqrt{\pi}} k^*. \quad (95)$$

1026 We take  $k^* = \eta = \log_2 n$  to obtain the bound

$$1027 \mathbb{E}W_1^\pm(\mu, \mu_\varepsilon) \leq \frac{1}{\sqrt{2n}} \mathbb{E}[(\mu + \varepsilon)_+(G_n)] + \frac{2n \log_2 n}{\sqrt{\pi}} \sigma. \quad (96)$$

1029 We now bound the first term in the RHS.

$$1030 \mathbb{E}[(\mu + \varepsilon)_+(G_n)] \leq \mathbb{E}[\mu_+(G_n)] + \mathbb{E}[\varepsilon_+(G_n)] \quad (97)$$

$$1031 = 1 + \mathbb{E}[\varepsilon_+(G_n)] \quad (98)$$

1032 where the last equality follows from the fact that  $\mu$  is a (non-negative) probability measure. By a symmetry argument

$$1033 \mathbb{E}\varepsilon_+(G_n) = \frac{1}{2} \mathbb{E}|\varepsilon|(G_n). \quad (99)$$

1034 Further set  $m = \frac{1}{2} \sum_{x \in G_n} |\varepsilon(x)|$  and recall that  $\varepsilon(x) \sim \mathcal{N}(0, \sigma^2(1 - 1/n^2))$  to derive

$$1035 \mathbb{E}m = \frac{n^2}{2} \sqrt{\frac{2}{\pi}} \sigma \sqrt{1 - \frac{1}{n^2}}. \quad (100)$$

1036 Thus,

$$1037 \frac{1}{\sqrt{2n}} \mathbb{E}[(\mu + \varepsilon)_+(G_n)] \leq \frac{1}{\sqrt{2n}} + \frac{\sigma}{2\sqrt{\pi}} n. \quad (101)$$

1038 Plugging this back into equation 96 gives

$$1039 \mathbb{E}W_1^\pm(\mu, \mu_\varepsilon) \leq \frac{2n \log_2 n + n/2}{\sqrt{\pi}} \sigma + \frac{1}{\sqrt{2n}}. \quad (102)$$

1040 Note that the same bound applies to  $\mathbb{E}W_1^\pm(\nu, \nu + \varepsilon_\nu)$ . By subtracting  $W_1^\pm(\mu, \nu)$  from both sides of equation 84 and taking expectations, we have

$$1041 \mathbb{E}[W_1^\pm(\mu_\varepsilon, \nu_\varepsilon) - W_1^\pm(\mu, \nu)] \leq \mathbb{E}W_1^\pm(\mu_\varepsilon, \mu) + \mathbb{E}W_1^\pm(\nu, \nu_\varepsilon) \\ 1042 \leq \frac{4n \log_2 n + n}{\sqrt{\pi}} \sigma + \frac{\sqrt{2}}{n}. \quad \square$$

1043 **Theorem 5** Let  $\mu, \nu : G_n \rightarrow [0, 1]$  be two probability measures on the  $n \times n$  unit grid  $G_n$  with cyclic boundary conditions and let  $\varepsilon_\mu, \varepsilon_\nu : G_n \rightarrow \mathbb{R}$  be signed noise measures that satisfy Assumption 1. For convenience we assume that  $n = 2^\eta$ , for  $\eta \in \mathbb{N}$ . Then

$$1044 \mathbb{E}[W_p^\pm(\mu + \varepsilon_\mu, \nu + \varepsilon_\nu)] \leq \left(\frac{\sqrt{2}}{2}\right)^{1-\frac{1}{p}} W_1(\mu, \nu)^{\frac{1}{p}} + \frac{\sqrt{2}}{2} \left(\frac{4}{\sqrt{\pi}} n \log_2 n + \frac{2}{\sqrt{\pi}} n\right)^{\frac{1}{p}} \sigma^{\frac{1}{p}}. \quad (103)$$

1045 *Proof of Theorem 5.* Using Proposition 6

$$1046 \mathbb{E}[W_p^\pm(\mu + \varepsilon_\mu, \nu + \varepsilon_\nu)] \leq \mathbb{E}\left[D^{1-\frac{1}{p}}(W_1(\mu, \nu) + W_1(\varepsilon_+, \varepsilon_-))\right]^{\frac{1}{p}} \quad (104)$$

1047 The function  $t \mapsto t^{1/p}$  is concave on  $[0, \infty)$ , hence by Jensen:

$$1048 \mathbb{E}\left[D^{1-\frac{1}{p}}(W_1(\mu, \nu) + W_1(\varepsilon_+, \varepsilon_-))\right]^{\frac{1}{p}} \leq D^{1-\frac{1}{p}} \left(\mathbb{E}[W_1(\mu, \nu) + W_1(\varepsilon_+, \varepsilon_-)]\right)^{\frac{1}{p}} \quad (105)$$

1049 By the linearity of expectation,

$$1050 D^{1-\frac{1}{p}} \left(\mathbb{E}[W_1(\mu, \nu) + W_1(\varepsilon_+, \varepsilon_-)]\right)^{\frac{1}{p}} = D^{1-\frac{1}{p}} \left(W_1(\mu, \nu) + \mathbb{E}[W_1(\varepsilon_+, \varepsilon_-)]\right)^{\frac{1}{p}} \quad (106)$$

1051 Finally, using Theorem 2 we get that

$$1052 D^{1-\frac{1}{p}} \left(W_1(\mu, \nu) + \mathbb{E}[W_1(\varepsilon_+, \varepsilon_-)]\right)^{\frac{1}{p}} \leq D^{1-\frac{1}{p}} \left(W_1(\mu, \nu) + \frac{2\sqrt{2}}{\sqrt{\pi}} \sigma n \log_2 n + \sqrt{\frac{2}{\pi}} \sigma n\right)^{\frac{1}{p}} \quad (107)$$

1053 Using Jensen,

$$1054 \mathbb{E}[W_p^\pm(\mu + \varepsilon_\mu, \nu + \varepsilon_\nu)] \leq \left(\frac{\sqrt{2}}{2}\right)^{1-\frac{1}{p}} W_1(\mu, \nu)^{\frac{1}{p}} + \frac{\sqrt{2}}{2} \left(\frac{4}{\sqrt{\pi}} n \log_2 n + \frac{2}{\sqrt{\pi}} n\right)^{\frac{1}{p}} \sigma^{\frac{1}{p}}. \quad (108)$$

1055  $\square$

## B UNBALANCED OPTIMAL TRANSPORT

Various approaches have been proposed to generalize the idea of optimal transport to the case of two measures whose total mass is not equal. See [Caffarelli & McCann \(2010\)](#); [Liero et al. \(2018\)](#); [Figalli \(2010\)](#), for instance. Among these proposals, one is particularly amenable to the analysis we carried out. Given  $\mu, \nu \in \mathcal{M}_+(X)$  two positive measures on a set  $X$  that do not necessarily have the same mass, the set of *subcouplings* of  $\mu$  and  $\nu$  is defined as

$$\Gamma_{\leq}(\mu, \nu) := \{\pi \in \mathcal{M}_+(X)^2 : \pi(A \times X) \leq \mu(A), \pi(B \times X) \leq \nu(B), \text{ for all } A, B \in \mathcal{B}(X)\},$$

where  $\mathcal{B}(X)$  is the set of Borel measures on  $X$ . For simplicity, set  $m_\mu := \mu(X)$ ,  $m_\nu := \nu(X)$  and  $m_\pi := \pi(X \times X)$ . Then, the  $(p, C)$  unbalanced Kantorovich–Rubinstein distance is defined by

$$\text{KR}_{p,C}(\mu, \nu) := \left( \inf_{\pi \in \Gamma_{\leq}(\mu, \nu)} \int_{X \times X} d^p(x, y) d\pi(x, y) + C^p \left( \frac{m_\mu + m_\nu}{2} - m_\pi \right) \right)^{\frac{1}{p}}. \quad (109)$$

The parameter  $C$  determines the range of admissible transport. Indeed, any subcoupling transferring mass between points that are further apart than  $C$  cannot be optimal, as destructing the mass would lead to a smaller objective function.

**Proposition 7.** *Consider a square  $2^\eta \times 2^\eta$  grid, where  $\eta \geq 0$  is integer, and a dyadic partition scheme. Let  $\mu, \nu$  be two measures on the grid, not necessarily with equal masses. It holds that,*

$$\text{KR}_{p,C}(\mu, \nu) \leq \frac{C^p}{2} |m_\mu - m_\nu| + \text{diam}(S)^p 2^{3p-1} \sum_{k=\ell^*}^{\eta} 2^{-pk} \sum_{Q \in \mathcal{D}^k} |\mu(Q) - \nu(Q)| \quad (110)$$

where

$$\ell^* = 1 + \min(L, \lfloor \max(0, \log_2(2 \text{diam}(S)/C)) \rfloor). \quad (111)$$

*Proof.* Looking at the objective in equation 109, a strategy to construct a good subcoupling is to match as much mass below scale  $C$  as possible and then just pay  $C^p$  for the mass that hasn't been coupled. Because of the coarse-to-fine dyadic decomposition, each pixel is a final leaf of the decomposition tree.

One can then apply Lemma 3.15 in [Struleva et al. \(2025\)](#) giving bounds on the distance on trees.  $\square$

Similarly to the above, we can define

$$\text{KR}_{p,C}^{\pm}(\mu, \nu) := \text{KR}_{p,C}(\mu_+ + \nu_-, \nu_+ + \mu_-).$$

**Theorem 6.** *Let  $\mu : G_n \rightarrow [0, 1]$  be a probability measure on the  $n \times n$  unit grid  $G_n$  with cyclic boundary conditions, and let  $\varepsilon$  satisfy Assumption 1. Further assume that  $n = 2^\eta$ , for  $\eta \in \mathbb{N}$ . Then, for  $C > 0, p \geq 1$ ,*

$$\mathbb{E} \text{KR}_{p,C}^{\pm}(\mu + \varepsilon, \mu) \leq \begin{cases} \frac{n\sigma}{\sqrt{2\pi}} + \text{diam}(S)^p 2^{3p-1} \frac{\sqrt{2}}{2} \sigma \sqrt{\frac{2}{\pi}} n(\eta - \ell^*) & \text{if } p = 1, \\ \frac{n\sigma}{\sqrt{2\pi}} + \text{diam}(S)^p 2^{3p-1} \frac{\sqrt{2}}{2} \sigma \sqrt{\frac{2}{\pi}} n(2^{2-\ell^*} - 2^{1-\eta}) & \text{if } p = 2. \end{cases} \quad (112)$$

*Proof of Theorem 6.* We apply Proposition 7 to the probability measures  $\mu_- + (\mu + \varepsilon)_+$  as well as  $(\mu + \varepsilon)_- + \mu_+$ . First, note that

$$\begin{aligned} \mathbb{E} |m_{\mu_- + (\mu + \varepsilon)_+} - m_{(\mu + \varepsilon)_- + \mu_+}| &= \mathbb{E} \left| \sum_{x \in G_n} -\mu_+(x) + \mu_-(x) + (\mu + \varepsilon)_+(x) - (\mu + \varepsilon)_-(x) \right| \\ &= n\sigma / \sqrt{2\pi}. \end{aligned}$$

Taking expectations and using independence and zero mean of the noise,

$$\sum_{k=\ell^*}^{\eta} 2^{-pk} \sum_{Q \in \mathcal{D}^k} |\mu_-(Q) + (\mu + \varepsilon)_+(Q) - (\mu + \varepsilon)_-(Q) - \mu_+(Q)| = \sum_{k=\ell^*}^{\eta} 2^{-pk} \sum_{Q \in \mathcal{D}^k} |\varepsilon(Q)|.$$

1134 Since each  $\varepsilon(x)$  is Gaussian with variance  $\sigma^2$ , one has  $\mathbb{E}|\sum_{x \in Q} \varepsilon(x)| \leq \sigma\sqrt{|Q|}\sqrt{2/\pi}$ . Further-  
 1135 more, the dyadic family  $\mathcal{D}_k$  has  $|\mathcal{D}_k| = 2^{2k}$  cubes of cardinality  $|Q| = n^2/2^{2k}$ . Therefore  
 1136

$$1137 \sum_{Q \in \mathcal{D}_k} \mathbb{E} \left| \sum_{x \in Q} \varepsilon(x) \right| \leq \sigma \sqrt{\frac{2}{\pi}} \sum_{Q \in \mathcal{D}_k} \sqrt{|Q|} = \sigma \sqrt{\frac{2}{\pi}} \cdot 2^{2k} \cdot \frac{n}{2^k} = \sigma \sqrt{\frac{2}{\pi}} n 2^k. \quad (113)$$

1139 Plugging this into the multiscale sum yields  
 1140

$$1141 \sum_{k=\ell^*}^{\eta} 2^{-pk} \sum_{Q \in \mathcal{D}_k} \mathbb{E} \left| \sum_{x \in Q} \varepsilon(x) \right| \leq \sigma \sqrt{\frac{2}{\pi}} n \sum_{k=\ell^*}^{\eta} 2^{1-p}. \quad (114)$$

□

1142  
1143  
1144  
1145  
1146  
1147  
1148  
1149  
1150  
1151  
1152  
1153  
1154  
1155  
1156  
1157  
1158  
1159  
1160  
1161  
1162  
1163  
1164  
1165  
1166  
1167  
1168  
1169  
1170  
1171  
1172  
1173  
1174  
1175  
1176  
1177  
1178  
1179  
1180  
1181  
1182  
1183  
1184  
1185  
1186  
1187
